# Supplementary material for: Neofabraea alba, an agent of apple Bull’s Eye Rot – multi-approach insights from Polish orchards
Source: Research Square preprint supplement (doi:10.21203/rs.3.rs-8779190/v1), 2026-02-23
Supplement: Supplementary file 1 [file f082d37398687e0e424387e3.docx]

Table S1. The factsheet with the numbers of strains identified as *Neofabraea* spp., the collection site, province, apple variety from which the isolate was obtained, and the assigned accession number from the GenBank database.

| **Strain number** | **Locality** | **Voivodeship** | **Variety** | **Accession number GenBank** |
| --- | --- | --- | --- | --- |
| G159/22 | Wandalin | Lubelskie | Idared | PX417785 |
| G320/22 | Gutanów | Lubelskie | Idared | PX417786 |
| G325/22 | Gutanów | Lubelskie | Golden delicious | PX417787 |
| G326/22 | Gutanów | Lubelskie | Golden delicious | PV537562.1 |
| G327/22 | Gutanów | Lubelskie | Golden delicious | PX417788 |
| G332/22 | Gutanów | Lubelskie | Ligol | PX417789 |
| G333/22 | Gutanów | Lubelskie | Ligol | PX417790 |
| G341/22 | Częstoborowice | Lubelskie | Idared | PV537570.1 |
| G342/22 | Częstoborowice | Lubelskie | Idared | PX417791 |
| G343/22 | Częstoborowice | Lubelskie | Idared | PX417792 |
| G344/22 | Częstoborowice | Lubelskie | Idared | PX417793 |
| G345/22 | Kolonia Świdnik Mały | Lubelskie | Szampion | PX417794 |
| G348/22 | Kolonia Świdnik Mały | Lubelskie | Szampion | PX417795 |
| G350/22 | Kolonia Świdnik Mały | Lubelskie | Szampion | PX417796 |
| G351/22 | Kolonia Świdnik Mały | Lubelskie | Szampion | PX417797 |
| G352/22 | Kolonia Świdnik Mały | Lubelskie | Szampion | PX417798 |
| G354/22 | Stryjno Pierwsze | Lubelskie | Golden delicious | PX417799 |
| G358/22 | Siedliska Pierwsze | Lubelskie | Jonagored | PX417800 |
| G359/22 | Siedliska Pierwsze | Lubelskie | Jonagored | PX417801 |
| G360/22 | Siedliska Pierwsze | Lubelskie | Jonagored | PX417802 |
| G361/22 | Siedliska Pierwsze | Lubelskie | Jonagored | PX417803 |
| G363/22 | Siedliska Pierwsze | Lubelskie | Jonagored | PX417804 |
| G365/22 | Siedliska Pierwsze | Lubelskie | Jonagored | PX417805 |
| G368/22 | Stryjno Pierwsze | Lubelskie | Golden delicious | PX417806 |
| G565/22 | Stryjno Pierwsze | Lubelskie | Golden Delicious | PX417807 |
| G566/22 | Stryjno Pierwsze | Lubelskie | Golden Delicious | PX417808 |
| G784/22 | Chruślanki | Lubelskie | Golden delicious | PX417809 |
| G785/22 | Chruślanki | Lubelskie | Golden delicious | PX417810 |
| G787/22 | Ratoszyn | Lubelskie | Jonagold | PX417811 |
| G788/22 | Ratoszyn | Lubelskie | Jonagold | PX417812 |
| G789/22 | Ratoszyn | Lubelskie | Jonagold | PV537569.1 |
| G790/22 | Ratoszyn | Lubelskie | Golden | PX417813 |
| G791/22 | Ratoszyn | Lubelskie | Golden | PX417814 |
| G792/22 | Ratoszyn | Lubelskie | Golden | PX417815 |
| G793/22 | Ratoszyn | Lubelskie | Golden | PX417816 |
| G794/22 | Ratoszyn | Lubelskie | Golden | PX417817 |
| G796/22 | Ratoszyn | Lubelskie | Golden | PX417818 |
| G798/22 | Ratoszyn | Lubelskie | Golden | PX417819 |
| G799/22 | Ratoszyn | Lubelskie | Golden | PX417820 |
| G800/22 | Ratoszyn | Lubelskie | Golden | PX417821 |
| G801/22 | Ratoszyn | Lubelskie | Golden | PX417822 |
| G802/22 | Ratoszyn | Lubelskie | Golden | PX417823 |
| G803/22 | Ratoszyn | Lubelskie | Golden | PX417824 |
| G807/22 | Rybitwy | Lubelskie | Red Jonaprince | PV537568.1 |
| G808/22 | Rybitwy | Lubelskie | Red Jonaprince | PX417825 |
| G809/22 | Rybitwy | Lubelskie | Red Jonaprince | PX417826 |
| G810/22 | Rybitwy | Lubelskie | Red Jonaprince | PX417827 |
| G811/22 | Rybitwy | Lubelskie | Red Jonaprince | PX417828 |
| G813/22 | Rybitwy | Lubelskie | Red Jonaprince | PX417829 |
| G814/22 | Rybitwy | Lubelskie | Red Jonaprince | PX417830 |
| G815/22 | Rybitwy | Lubelskie | Red Jonaprince | PX417831 |
| G816/22 | Kolonia Chruślina | Lubelskie | Jonagold | PX417832 |
| G817/22 | Chruślina | Lubelskie | Jonagold | PX417833 |
| G818/22 | Chruślina | Lubelskie | Jonagold | PX417834 |
| G821/22 | Rybitwy | Lubelskie | Red Jonaprince | PX417835 |
| G823/22 | Rybitwy | Lubelskie | Red Jonaprince | PX417836 |
| G827/22 | Rybitwy | Lubelskie | Golden delicious | PX417837 |
| G828/22 | Rybitwy | Lubelskie | Golden delicious | PX417838 |
| G9/23 | Boby | Lubelskie | Golden delicious | PX417688 |
| G10/23 | Boby | Lubelskie | Golden delicious | PX417689 |
| G11/23 | Boby | Lubelskie | Golden delicious | PX417690 |
| G12/23 | Boby | Lubelskie | Piros | PX417691 |
| G13/23 | Boby | Lubelskie | Piros | PX417692 |
| G15/23 | Boby | Lubelskie | Piros | PX417693 |
| G17/23 | Boby | Lubelskie | Piros | PX417694 |
| G20/23 | Boby | Lubelskie | Piros | PX417695 |
| G22/23 | Boby | Lubelskie | Piros | PX417696 |
| G23/23 | Boby | Lubelskie | Piros | PX417697 |
| G24/23 | Boby | Lubelskie | Piros | PX417698 |
| G25/23 | Boby | Lubelskie | Piros | PX417699 |
| G31/23 | Boby | Lubelskie | Prince | PX417700 |
| G32/23 | Boby | Lubelskie | Prince | PX417701 |
| G33/23 | Boby | Lubelskie | Prince | PX417702 |
| G43/23 | Stanisławów | Mazowieckie | Prince | PX417703 |
| G65/23 | Niesiołowice | Lubelskie | Prince | PX417704 |
| G88/23 | Stryjno Pierwsze | Lubelskie | Rubinstar | PX417705 |
| G89/23 | Stryjno Pierwsze | Lubelskie | Rubinstar | PX417706 |
| G90/23 | Stryjno Pierwsze | Lubelskie | Rubinstar | PX417707 |
| G91/23 | Izdebno | Lubelskie | Golden | PX417708 |
| G96/23 | Izdebno | Lubelskie | Golden | PX417709 |
| G99/23 | Klimusin | Lubelskie | Champion | PX417710 |
| G100/23 | Klimusin | Lubelskie | Champion | PX417711 |
| G101/23 | Klimusin | Lubelskie | Champion | PX417712 |
| G104/23 | Klimusin | Lubelskie | Baskoop | PX417713 |
| G105/23 | Świdnik | Lubelskie | Honey crisp | PX417714 |
| G106/23 | Świdnik | Lubelskie | Honey crisp | PX417715 |
| G107/23 | Stryjno Pierwsze | Lubelskie | Gloster | PX417716 |
| G109/23 | Izdebno | Lubelskie | Rubin | PX417717 |
| G110/23 | Izdebno | Lubelskie | Golden Bohemid | PX417718 |
| G111/23 | Izdebno | Lubelskie | Golden Bohemid | PX417719 |
| G112/23 | Izdebno | Lubelskie | Golden Bohemid | PX417720 |
| G113/23 | Izdebno | Lubelskie | Golden Bohemid | PX417721 |
| G123/23 | Owczarnia | Mazowieckie | Idared | PX417722 |
| G127/23 | Niesiołowice | Małopolskie | Idared | PX417723 |
| G132/23 | Franciszkow Stary | Lubelskie | Elisa | PX417724 |
| G134/23 | Franciszkow Stary | Lubelskie | Champion | PX417725 |
| G137/23 | Franciszkow Stary | Lubelskie | Champion | PX417726 |
| G140/23 | Franciszkow Stary | Lubelskie | Champion | PX417727 |
| G202/23 | Okolice Hrubieszowa | Lubelskie | Gala Royal | PX417728 |
| G203/23 | Okolice Hrubieszowa | Lubelskie | Gala Royal | PX417729 |
| G205/23 | Okolice Hrubieszowa | Lubelskie | Gala Royal | PX417730 |
| G206/23 | Okolice Hrubieszowa | Lubelskie | Gala Royal | PX417731 |
| G208/23 | Warka | Mazowieckie | Golden Deliciuos | PX417732 |
| G210/23 | Warka | Mazowieckie | Golden Deliciuos | PX417733 |
| G211/23 | Warka | Mazowieckie | Golden Deliciuos | PX417734 |
| G212/23 | Warka | Mazowieckie | Golden Deliciuos | PX417735 |
| G213/23 | Warka | Mazowieckie | Golden Deliciuos | PX417736 |
| G214/23 | Warka | Mazowieckie | Golden Deliciuos | PX417737 |
| G223/23 | Moniaki | Lubelskie | Golden | PX417738 |
| G224/23 | Moniaki | Lubelskie | Golden | PX417739 |
| G225/23 | Okręglica | Łódzkie | Golden | PX417740 |
| G226/23 | Okręglica | Łódzkie | Golden | PX417741 |
| G227/23 | Godów | Lubelskie | Prince | PX417742 |
| G228/23 | Godów | Lubelskie | Prince | PX417743 |
| G231/23 | Chruślina Kolonia | Lubelskie | Ligol | PX417744 |
| G233/23 | Chruślina Kolonia | Lubelskie | Ligol | PX417745 |
| G234/23 | Wierzbica | Mazowieckie | Golden | PX417746 |
| G238/23 | Wierzbica | Mazowieckie | Gala | PX417747 |
| G243/23 | Moniaki | Lubelskie | Prince | PX417748 |
| G244/23 | Majdan Maniacki | Lubelskie | Gloster | PX417749 |
| G247/23 | Kopanina Kamieńka | Lubelskie | Mutsu | PX417750 |
| G248/23 | Stanisławów | Mazowieckie | Champion | PX417751 |
| G251/23 | Chruślanki Józefowskie | Lubelskie | Champion | PX417752 |
| G253/23 | Wandalin | Lubelskie | Jonagored | PX417753 |
| G254/23 | Wandalin | Lubelskie | Jonagored | PX417754 |
| G255/23 | Nietrzeba | Lubelskie | Jonagored | PX417755 |
| G257/23 | Kolonia Chruślina | Lubelskie | Idared | PX417756 |
| G265/23 | Klimusin | Lubelskie | Rubinstar | PX417757 |
| G267/23 | Klimusin | Lubelskie | Rubinstar | PX417758 |
| G269/23 | Klimusin | Lubelskie | Rubinstar | PX417759 |
| G271/23 | Klimusin | Lubelskie | Rubinstar | PX417760 |
| G275/23 | Klimusin | Lubelskie | Rubinstar | PX417761 |
| G276/23 | Klimusin | Lubelskie | Rubinstar | PX417762 |
| G278/23 | Klimusin | Lubelskie | Rubinstar | PX417763 |
| G279/23 | Klimusin | Lubelskie | Mutsu | PX417764 |
| G280/23 | Klimusin | Lubelskie | Rubinstar | PX417765 |
| G282/23 | Stryjno Kolonia | Lubelskie | Jonaprince | PX417766 |
| G283/23 | Stryjno Kolonia | Lubelskie | Jonaprince | PX417767 |
| G284/23 | Stryjno Kolonia | Lubelskie | Decosta | PX417768 |
| G286/23 | Stryjno Kolonia | Lubelskie | Decosta | PX417769 |
| G287/23 | Stryjno Kolonia | Lubelskie | Decosta | PX417770 |
| G291/23 | Stryjno Kolonia | Lubelskie | Decosta | PX417771 |
| G292/23 | Stryjno Kolonia | Lubelskie | Decosta | PX417772 |
| G294/23 | Stryjno Kolonia | Lubelskie | Decosta | PX417773 |
| G297/23 | Stryjno Kolonia | Lubelskie | Decosta | PX417774 |
| G299/23 | Stryjno Kolonia | Lubelskie | Decosta | PX417775 |
| G300/23 | Stryjno Kolonia | Lubelskie | Topaz | PX417776 |
| G301/23 | Stryjno Kolonia | Lubelskie | Boskoop | PX417777 |
| G302/23 | Stryjno Kolonia | Lubelskie | Gloster | PX417778 |
| G303/23 | Stryjno Kolonia | Lubelskie | Gloster | PX417779 |
| G305/23 | Stryjno Kolonia | Lubelskie | Decosta | PX417780 |
| G306/23 | Stryjno Kolonia | Lubelskie | Mutsu | PX417781 |
| G307/23 | Stryjno Kolonia | Lubelskie | Mutsu | PX417782 |
| G308/23 | Stryjno Kolonia | Lubelskie | Jonaprince | PX417783 |
| G314/23 | Stryjno Kolonia | Lubelskie | Elise | PX417784 |
